# Supplementary material for: Multi-omics analyses and machine learning prediction of oviductal responses in the presence of gametes and embryos
Source: eLife journal article supplement (doi:10.7554/elife.100705), 2024-10-01
Supplement: fig3-data2 [file elife-100705-fig3-data2-v1.zip]

Figure 3 - source data 2

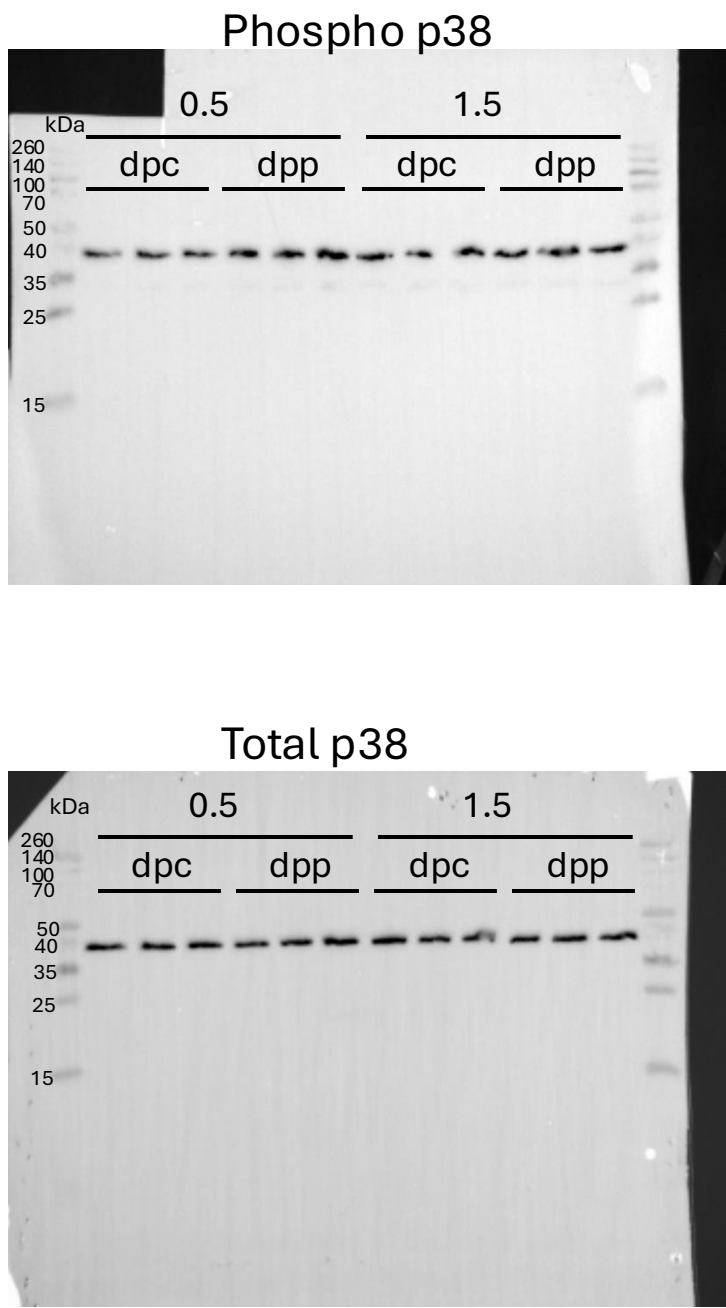

**Figure 3 - source data 2:** Immunoblotting of phosphorylated p38 and total p38 in the whole oviduct collected at 0.5 dpc, 0.5 dpp, 1.5 dpc, and 1.5 dpp. Each lane represents protein samples from each mouse. A protein ladder was used to determine molecular weights (Spectra™ Multicolor Broad Range Protein Ladder, ThermoFisher, #26634). (n=3 mice/group/timepoint)
