# Supplementary material for: Multi-omics analyses and machine learning prediction of oviductal responses in the presence of gametes and embryos
Source: eLife journal article supplement (doi:10.7554/elife.100705), 2024-10-01
Supplement: supp6 [file elife-100705-supp6-v1.pdf]

## Supplementary File 6

### Multi-omics analyses and machine learning prediction of oviductal responses in the presence of gametes and embryos

Ryan M. Finnerty<sup>1</sup>, Daniel J. Carulli<sup>2</sup>, Akshata Hegde<sup>3</sup>, Yanli Wang<sup>3</sup>, Frimpong Baodu<sup>3</sup>, Sarayut Winuthayanon<sup>2</sup>, Jianlin Cheng<sup>3</sup>, and Wipawee Winuthayanon<sup>1,2,\*</sup>

#### Supplementary file 6a: scRNA-seq output for each dataset in this study

| Sample Name | Estimate number of cells | Total reads | Mean reads/cell | Median gene/cell | Median UMI counts/cell | Total detected gene # | Sequencing saturation |
|-------------|--------------------------|-------------|-----------------|------------------|------------------------|-----------------------|-----------------------|
| Ctrl_IA     | 8,793                    | 89M         | 10,153          | 1,387            | 2,976                  | 19,843                | 32.1%                 |
| Ctrl_IU     | 10,387                   | 95M         | 9,173           | 967              | 2,194                  | 19,285                | 36.6%                 |
| 0.5_IA      | 3,689                    | 105M        | 28,382          | 1,585            | 3,891                  | 19,044                | 64.4%                 |
| 0.5_IU      | 7,551                    | 93M         | 12,312          | 731              | 1,562                  | 18,612                | 67.1%                 |
| 1.5_IA      | 11,760                   | 84M         | 7,184           | 1,138            | 2,116                  | 19,941                | 28.0%                 |
| 1.5_IU      | 10,480                   | 84M         | 7,989           | 860              | 1,792                  | 19,525                | 35.6%                 |
| 2.5_IA      | 4,504                    | 107M        | 23,870          | 1,616            | 3,590                  | 19,250                | 60.5%                 |
| 2.5_IU      | 7,804                    | 100M        | 12,871          | 928              | 2,178                  | 18,350                | 65.0%                 |

**Supplementary file 6b:** The result of predicting protein abundance from bulk RNA-seq data at 2.5 dpc by the transformer model. The model is used to classify proteins into two categories, abundant or not abundant, according to two different thresholds: 0.6 and 0.8, respectively. The model can rather accurately predict the abundant proteins from RNA-seq data.

| Protein Abundance Threshold (log-min-max normalized) | Accuracy | F1Score  | Precision | Recall   |
|------------------------------------------------------|----------|----------|-----------|----------|
| 0.8                                                  | 0.907315 | 0.922326 | 0.985852  | 0.866492 |
| 0.6                                                  | 0.983791 | 0.78453  | 0.972603  | 0.657407 |
